# Supplementary material
Source: publisher figshare collection journal article supplement (https://future-science-group.figshare.com/articles/dataset/_/22293157)
Supplement: Supplementary file 1 [file 1]

| **SNP** | **Sequence** | **Genomic position** | **Length (bp)** |
| --- | --- | --- | --- |
|  | |  |  |
| **rs15524** | |  |  |
| Forward primer | GGCACAGCTTTCTTGAAG | chr7:99648091-99648491 | 127 |
| Reverse primer | TAGACACGCAAGGACTTC |
|  | |  |  |
| **rs2291075** | |  |  |
| Forward primer | TAGGGGAGACTCCCATAGTAC | chr12:21178491-21178891 | 128 |
| Reverse primer | AGACAAAGGGAAAGTGATCATACA |
|  | |  |  |
| **rs9200** | |  |  |
| Forward primer | GGCTTCAAGAATGTGTTTC | chr5:41142304-41142704 | 116 |
| Reverse primer | TGTAGCCTGTGACATTAAG |
|  | |  |  |
| **rs776746** | |  |  |
| Forward primer | TGATGAAGGGTAATGTGGT | chr7:99672666-99673166 | 85 |
| Reverse primer | CTGTCATTTCTAACCATAATCTC |
|  | |  |  |
| **rs1128503** | |  |  |
| Forward primer | CCGTCTGCCCACTCT | chr7:87550085-87550485 | 104 |
| Reverse primer | CAGTTCCTATATCCTGTGTCT |
|  | |  |  |
| **rs1045642** | |  |  |
| Forward primer | GGCAGTGACTCGATGAAGG | chr7:87509079-87509579 | 89 |
| Reverse primer | TATGGAGACAACAGCCGGG |
|  |  |  |  |
| **rs1057868** |  |  |  |
| Forward primer | GCATCAACAAGGGCGTGG | chr7:75985438-75985938 | 95 |
| Reverse primer | CTTGCGCACGAACATGGG |
|  |  |  |  |
| **rs7828796** |  |  |  |
| Forward primer | TTAGCTCTCCAGATGAAGTTAGTG | chr8:83368047-83368547 | 79 |
| Reverse primer | TCAAACCCCCTTCACCAATT |
|  |  |  |  |
| **rs2242480** |  |  |  |
| Forward primer | TACATAGAGTCAGTGAAAGAATCAG | chr7:99763593-99764093 | 219 |
| Reverse primer | GCAGTGTTCTCTCCTTCATTAT |
|  |  |  |  |
| **rs4646450** |  |  |  |
| Forward primer | CTAACAAAGAGCGAGAGGAC | chr7:99668445-99668945 | 73 |
| Reverse primer | AATACACACTTGAATTCTTTGTCA |
|  |  |  |  |
| **rs17611** |  |  |  |
| Forward primer | AATGCATATATCACTTAAACCTGCT | chr9:121006672-121007172 | 91 |
| Reverse primer | AGTTTGCCCTACCTGATTCTC |
|  |  |  |  |
| **rs10211** |  |  |  |
| Forward primer | TAACACTCTATACAGACCATGA | chr7:99705171-99705571 | 84 |
| Reverse primer | GACGGGCTTCATCCAAT |
|  |  |  |  |
| **rs2032582** |  |  |  |
| Forward primer | AGTTTGACTCACCTTCCCAG | chr7:87531052-87531552 | 60 |
| Reverse primer | TCTGGACAAGCACTGAAAGA |

**Supplementary Table 1**: HRM primer details.
