# Supplementary material
Source: publisher figshare collection journal article supplement (https://future-science-group.figshare.com/articles/dataset/_/22293157)
Supplement: Supplementary file 1 [file 1]

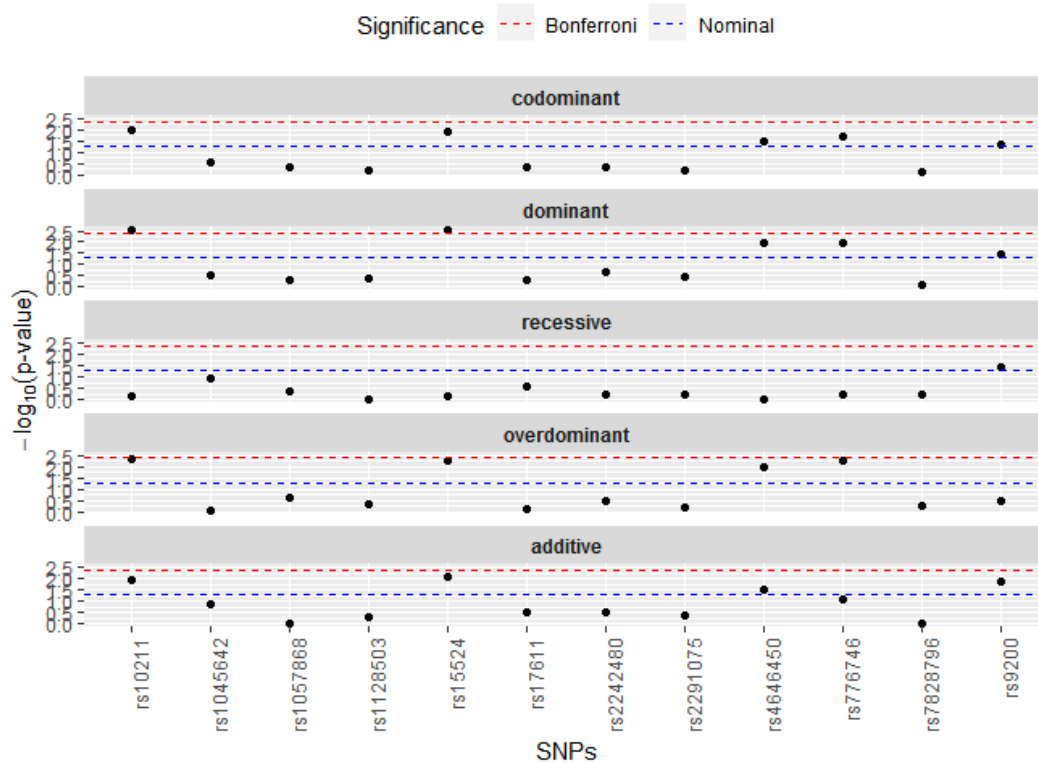

Convalescence Period

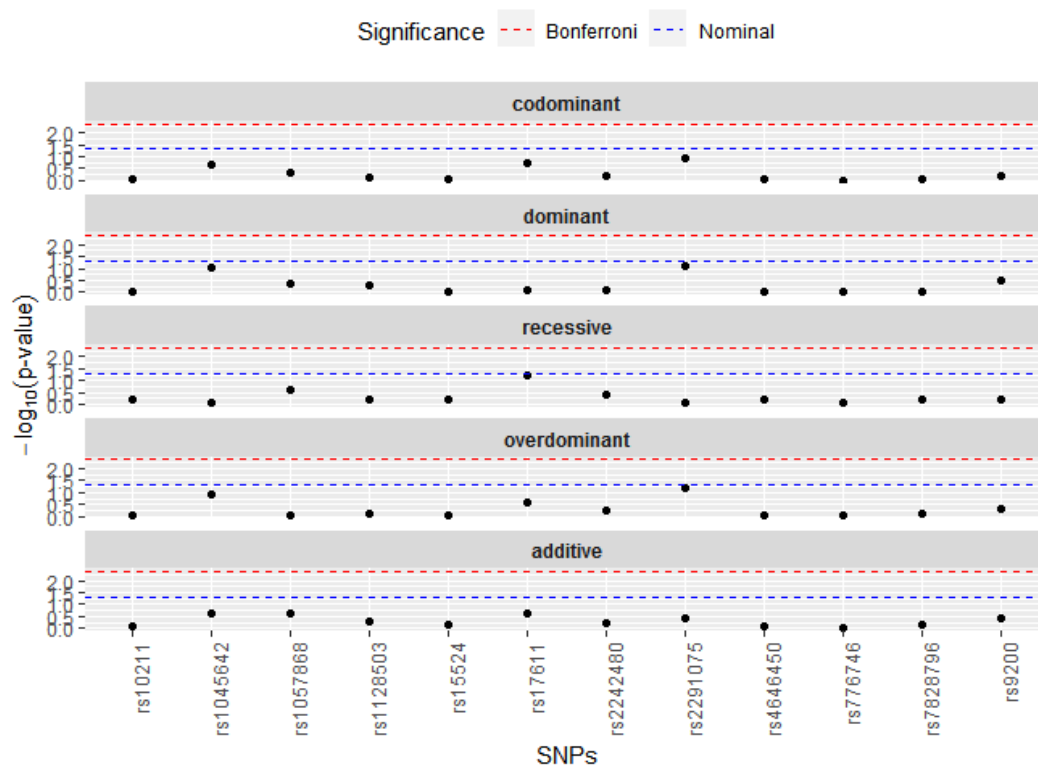

Stabilization Period

**Supplementary Figure 1: Association Analysis.** **Note:** The two graphs represent the association between candidate SNPs with TAC log (Co/D). The red dotted line represents the Bonferroni corrected significance level and the blue dotted line represents the nominal significance level.
